# Supplementary material for: Successive detection of glucose and bio-copper in human serum based on a multiplex biosensor of gold nanorods
Source: Royal Society of Chemistry journal article supplement (doi:10.1039/c4ay02722a), 2014-12-01
Supplement: c4ay02722a1.pdf [file c4ay02722a1.pdf]

Supplementary information

**Successive detection of glucose and bio-copper in human serum  
based on multiplex biosensor of gold nanorods**

Shenna Chen, Qian Zhao, Lingyang Zhang, Xiaodong Xia, Haowen Huang\*

*Key Laboratory of Theoretical Organic Chemistry and Function Molecule, Ministry  
of Education, Hunan Provincial University Key Laboratory of QSAR/QSPR, School of  
Chemistry and Chemical Engineering, Hunan University of Science and Technology,  
Xiangtan, China.*

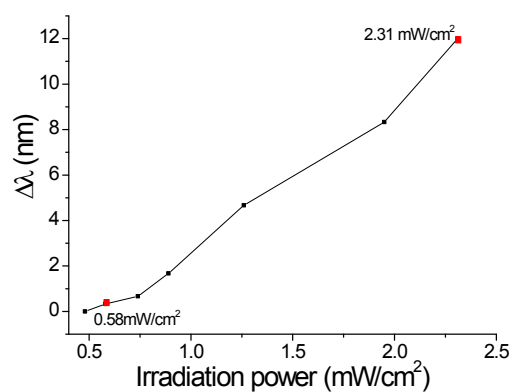

Figure S1. The relationship between degree of blue-shift of LPW and the intensity of UV light.

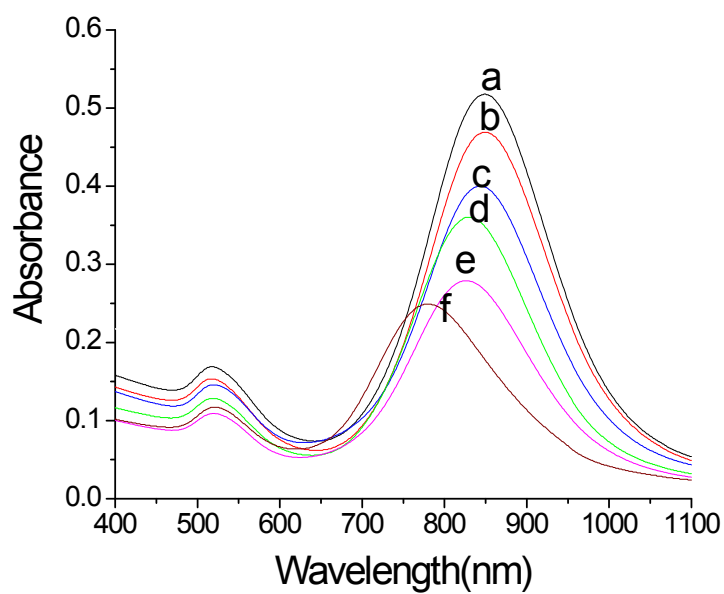

**Figure S2.** Absorption spectra obtained from the GNRs reacting with various concentration of  $\text{Cu}^{2+}$  in the presence of  $\text{Na}_2\text{S}_2\text{O}_3$ . (a: as-synthesized GNRs, b:  $1 \times 10^{-10}$ , c:  $1 \times 10^{-9}$ , d:  $1 \times 10^{-8}$ , e:  $1 \times 10^{-7}$ , f:  $1 \times 10^{-6}$  M  $\text{Cu}^{2+}$ )

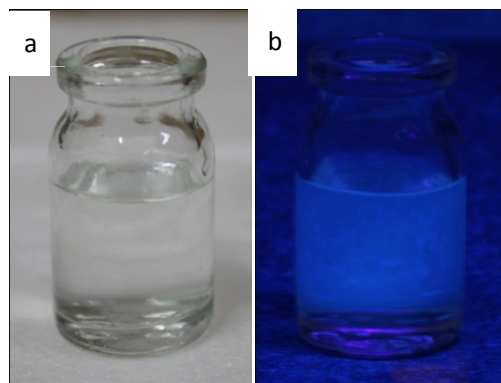

**Figure S3.** Photographs of the copper nanoclusters under visible light (a) under UV light (b).
